# Supplementary material
Source: Elsevier journal article supplement (https://www.sciencedirect.com/science/article/pii/S0001731015003439)
Supplement: mmc1 [file S0001731015003439:mmc1.docx]

| **CUESTIONARIO DE SATISFACCION DEL ESPECIALISTA CON EL TRATAMIENTO CON ALITRETINOÍNA ORAL PARA EL ECM**  Por favor, indique su grado de satisfacción (1=nada satisfecho, 2=poco satisfecho, 3=satisfecho, 4=bastante satisfecho, 5=muy satisfecho) con los siguientes aspectos:   | La eficacia de alitretinoína oral en el tratamiento del ECM | 1 | 2 | 3 | 4 | 5 | | --- | --- | --- | --- | --- | --- | | El tiempo que se tarda en obtener respuesta al tratamiento del ECM con alitretinoína oral | 1 | 2 | 3 | 4 | 5 | | El tipo de respuesta al tratamiento del ECM que se obtiene con alitretinoína oral | 1 | 2 | 3 | 4 | 5 | | El perfil de seguridad de alitretinoína oral en el tratamiento del ECM | 1 | 2 | 3 | 4 | 5 | | La duración de la respuesta al tratamiento con alitretinoína oral | 1 | 2 | 3 | 4 | 5 | | La tolerancia del tratamiento con alitretinoína oral | 1 | 2 | 3 | 4 | 5 | | Las precauciones de uso que han de tenerse en cuenta con alitretinoína oral | 1 | 2 | 3 | 4 | 5 | | La tasa de recidivas del ECM que ocurren con la administración de alitretinoína oral | 1 | 2 | 3 | 4 | 5 | | La proporción de pacientes con ECM que responden al tratamiento con alitretinoína oral | 1 | 2 | 3 | 4 | 5 | | Las condiciones de prescripción y dispensación de alitretinoína oral actualmente vigentes en el sistema sanitario español | 1 | 2 | 3 | 4 | 5 |   Por favor, indique el grado de satisfacción global con el tratamiento con alitretinoína oral del ECM severo:  ⬜ Nada satisfecho  ⬜ Poco satisfecho  ⬜ Satisfecho  ⬜ Bastante satisfecho  ⬜ Muy satisfecho  ⬜ No sabe/no contesta  En su opinión, el cumplimiento del tratamiento con alitretinoína oral de los pacientes con ECM comparada con los tratamientos estándares para el ECM es:  ⬜ Mejor  ⬜ Igual  ⬜ Peor  ⬜ No sabe/no contesta  En su opinión, la adherencia al tratamiento con alitretinoína oral de los pacientes con ECM comparada con los tratamientos estándares es:  ⬜ Mejor  ⬜ Igual  ⬜ Peor  ⬜ No sabe/no contesta  En su opinión, la reincorporación laboral de los pacientes tratados con alitretinoína oral frente a otros tratamientos para el ECM es:  ⬜ Más rápida  ⬜ Igual  ⬜ Más lenta  ⬜ No sabe/no contesta  De acuerdo con su experiencia con el uso de alitretinoína oral, ¿la indicaría nuevamente a pacientes con eczema crónico de manos severo?    ⬜ Siempre  ⬜ A veces  ⬜ Nunca  ⬜ No sabe/no contesta  De acuerdo con su experiencia con el uso de alitretinoína oral, ¿sugeriría a otros profesionales dermatólogos que la empleen en pacientes con eczema crónico de manos severo?  ⬜ Siempre  ⬜ A veces  ⬜ Nunca  ⬜ No sabe/no contesta  Por favor, cuantifique en qué porcentaje ha seguido de forma estricta la ficha técnica a la hora de prescribir alitretinoína oral en pacientes con ECM severo:  ⬜ 25%  ⬜ 50%  ⬜ 75%  ⬜ 100%  ⬜ No conozco la ficha técnica |
| --- | --- | --- | --- | --- | --- | --- | --- | --- | --- | --- | --- | --- | --- | --- | --- | --- | --- | --- | --- | --- | --- | --- | --- | --- | --- | --- | --- | --- | --- | --- | --- | --- | --- | --- | --- | --- | --- | --- | --- | --- | --- | --- | --- | --- | --- | --- | --- | --- | --- | --- | --- | --- | --- | --- | --- | --- | --- | --- | --- | --- |
